# Supplementary material for: Glycol-functionalized ionic liquids for high-temperature enzymatic ring-opening polymerization
Source: Royal Society of Chemistry journal article supplement (doi:10.1039/c8ra07733a), 2018-01-01
Supplement: c8ra07733a1.pdf [file c8ra07733a1.pdf]

*Electronic Supporting Information (ESI)*

**Glycol-Functionalized Ionic Liquids for High-Temperature Enzymatic Ring-Opening Polymerization**

Hua Zhao,<sup>\*1</sup> Lennox O. Afriyie,<sup>1</sup> Nathaniel E. Larm,<sup>2</sup> and Gary A. Baker<sup>2</sup>

<sup>1</sup> Department of Chemistry and Biochemistry, University of Northern Colorado, Greeley, CO 80639, USA

<sup>2</sup> Department of Chemistry, University of Missouri-Columbia, Columbia, MO 65211, USA

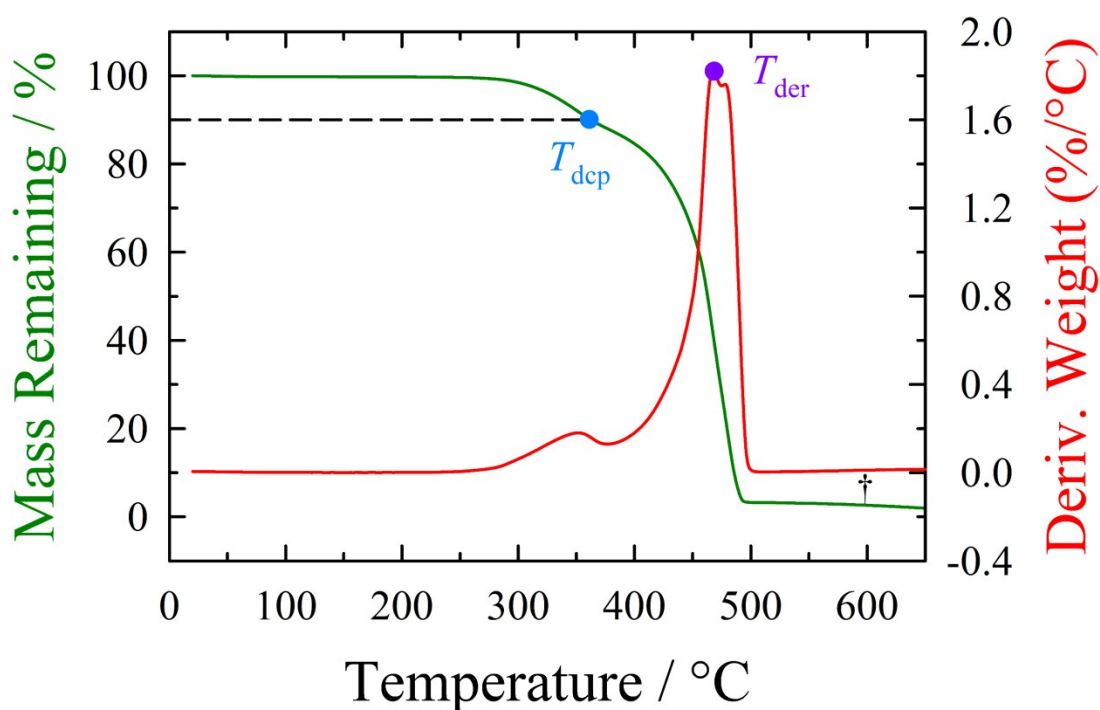

**Figure S1.** Thermogravimetric analysis of IL #1 (see Table 1).

<sup>\*</sup> Corresponding author. Email: [hua.zhao@unco.edu](mailto:hua.zhao@unco.edu), or [huazhao98@gmail.com](mailto:huazhao98@gmail.com)

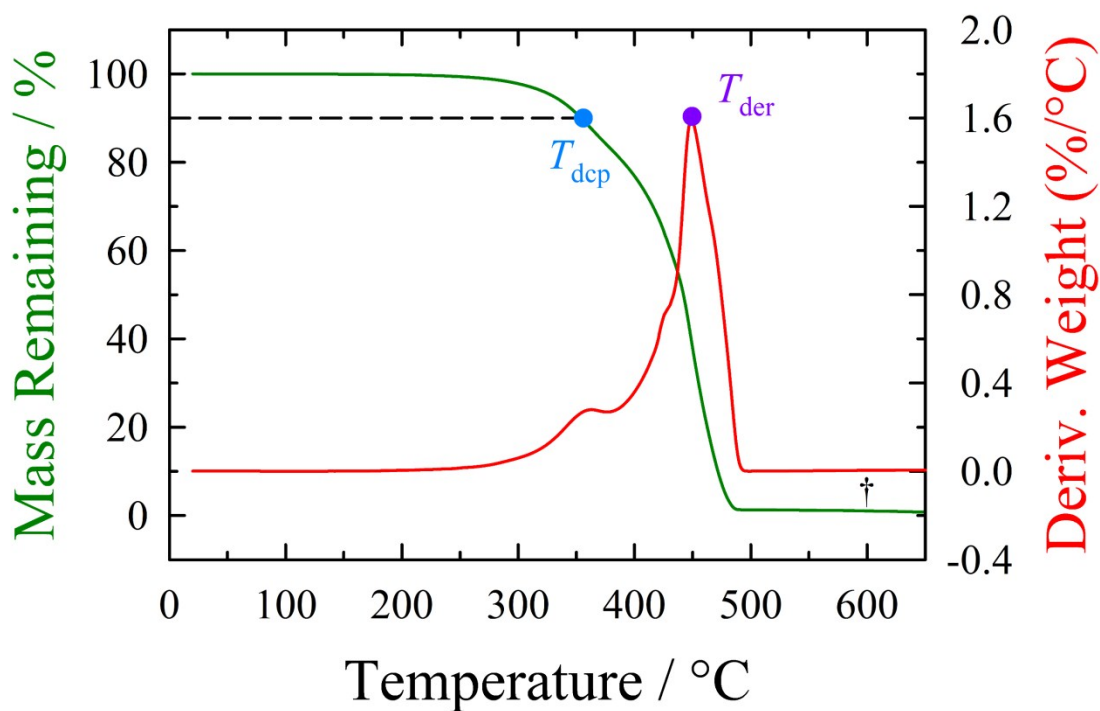

**Figure S2.** Thermogravimetric analysis of IL #2 (see Table 1).

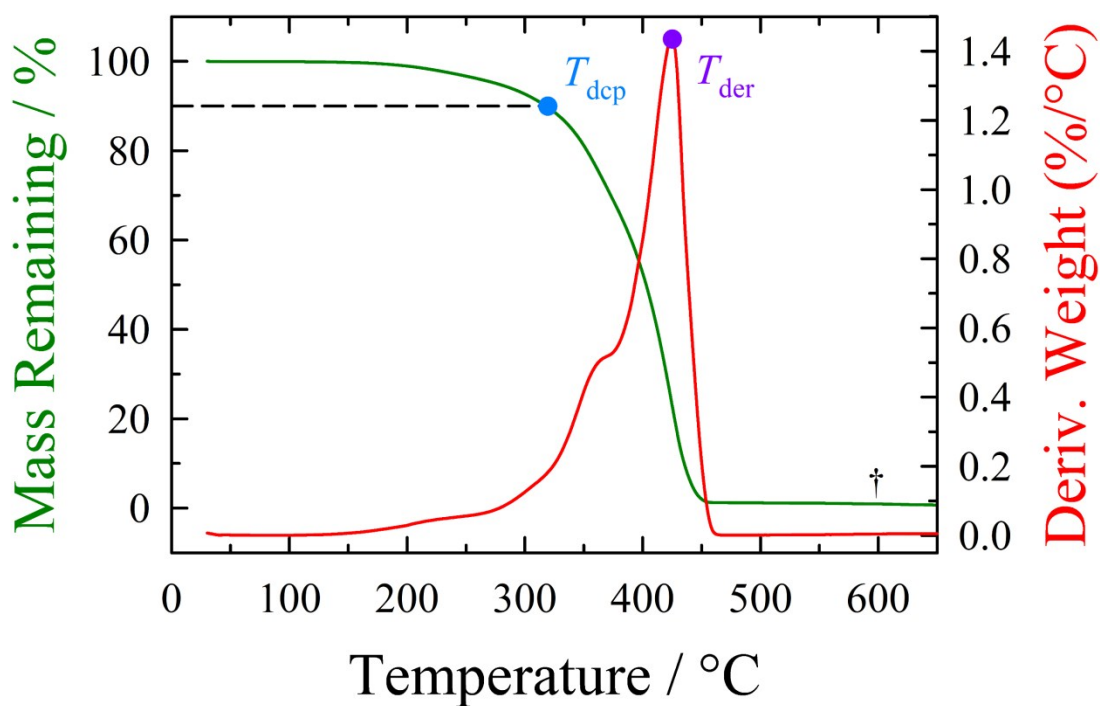

**Figure S3.** Thermogravimetric analysis of IL #3 (see Table 1).

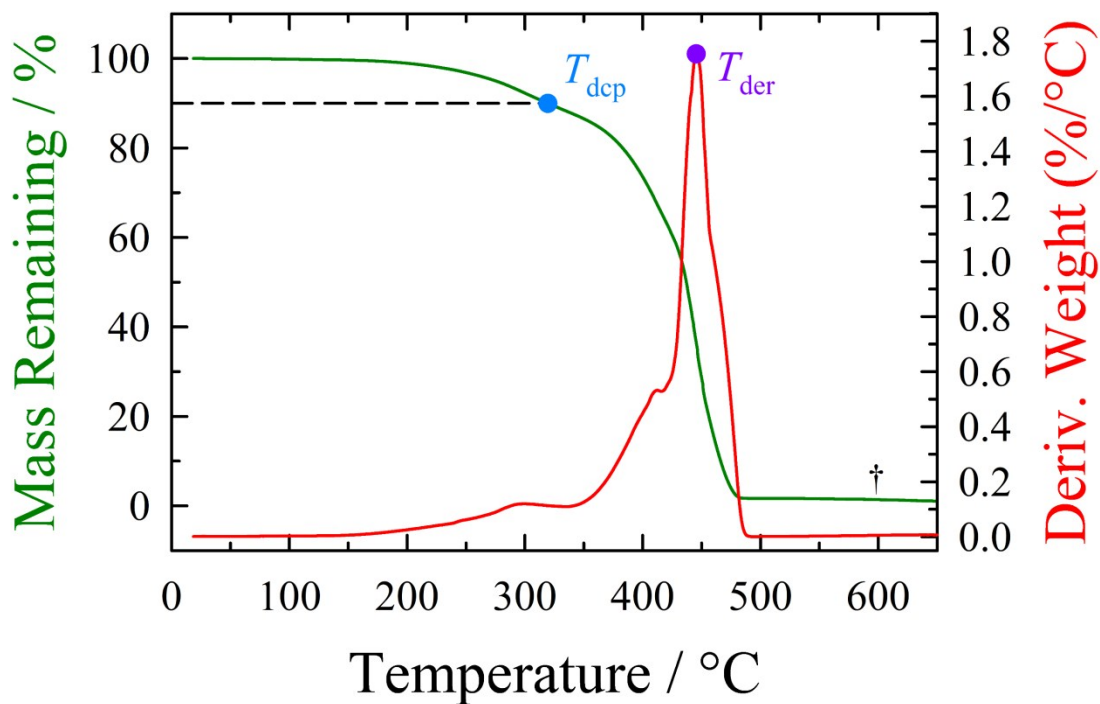

**Figure S4.** Thermogravimetric analysis of IL #4 (see Table 1).

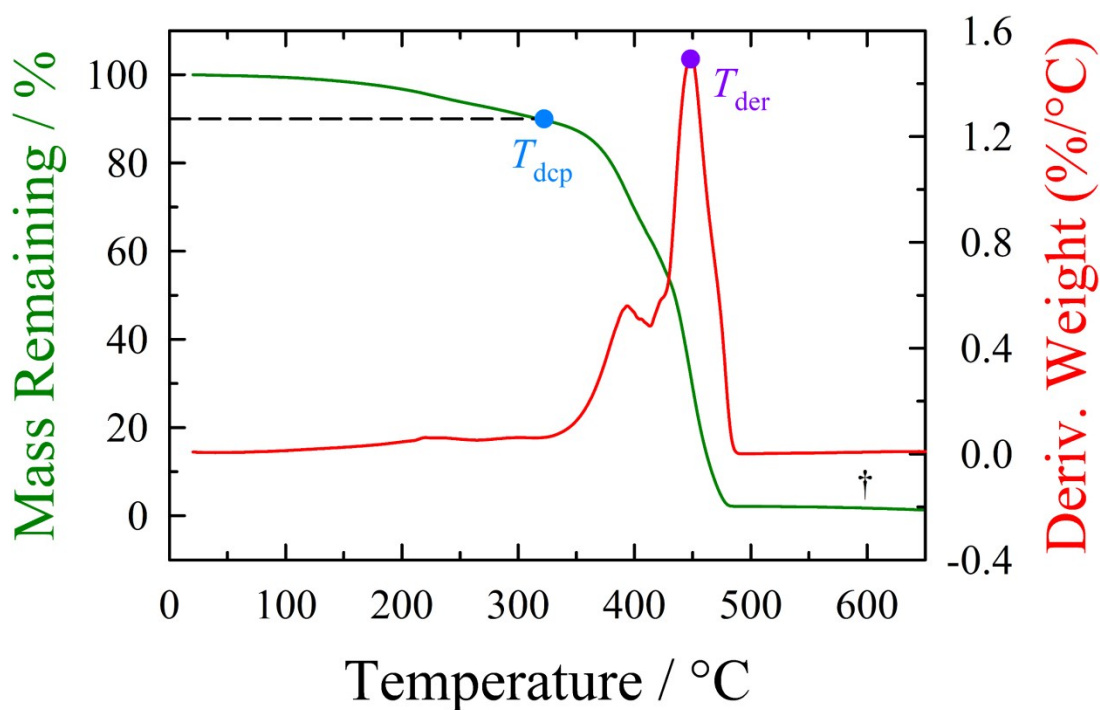

**Figure S5.** Thermogravimetric analysis of IL #5 (see Table 1).

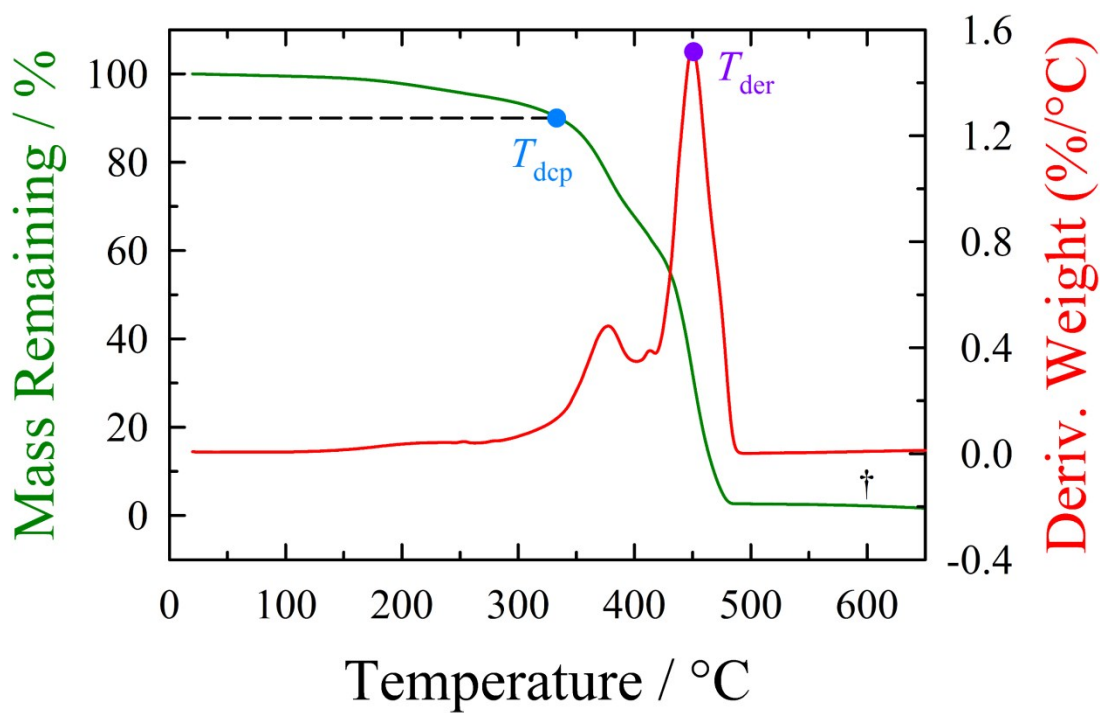

**Figure S6.** Thermogravimetric analysis of IL #6 (see Table 1).

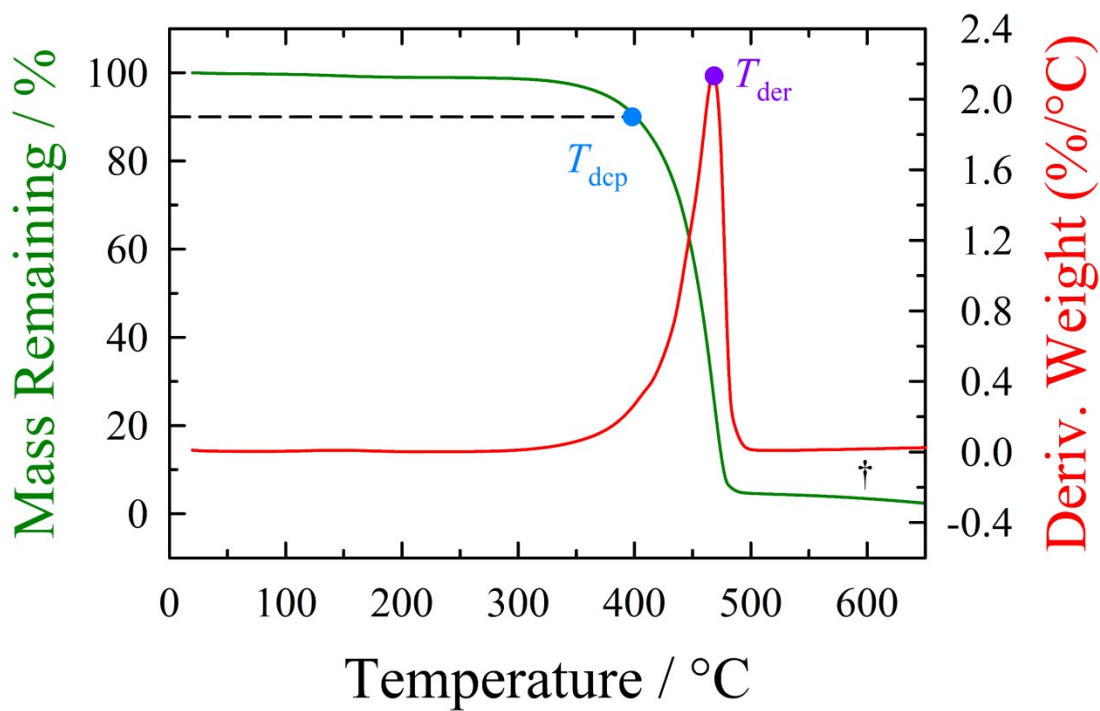

**Figure S7.** Thermogravimetric analysis of IL #7 (see Table 1).

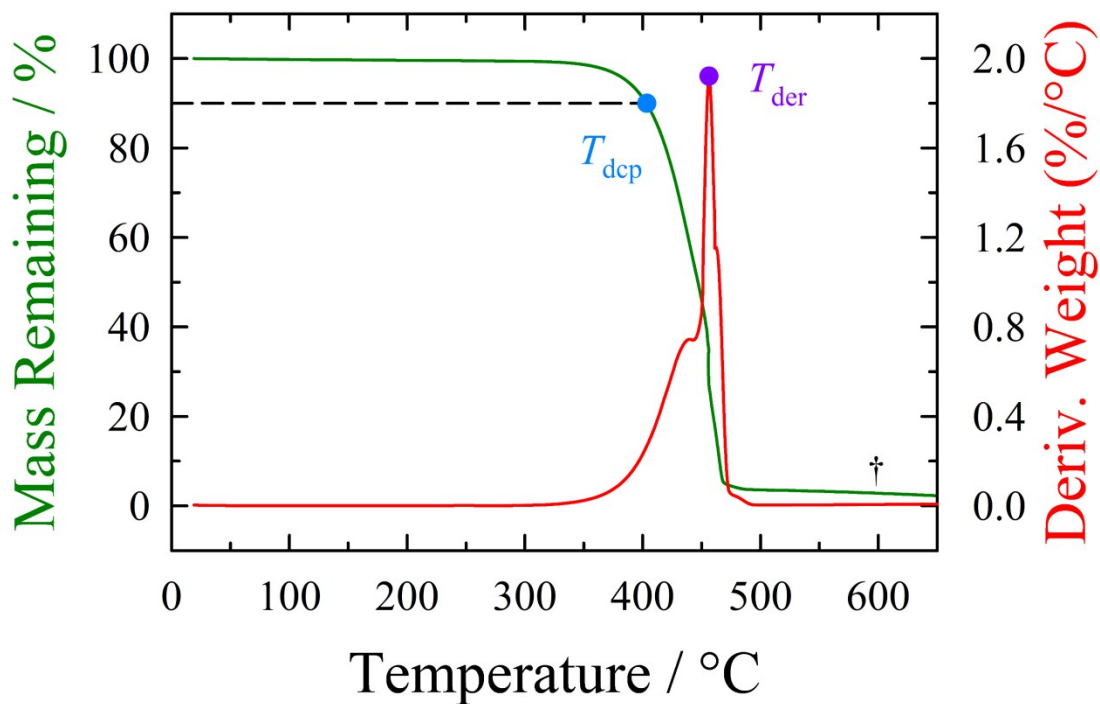

**Figure S8.** Thermogravimetric analysis of IL #8 (see Table 1).

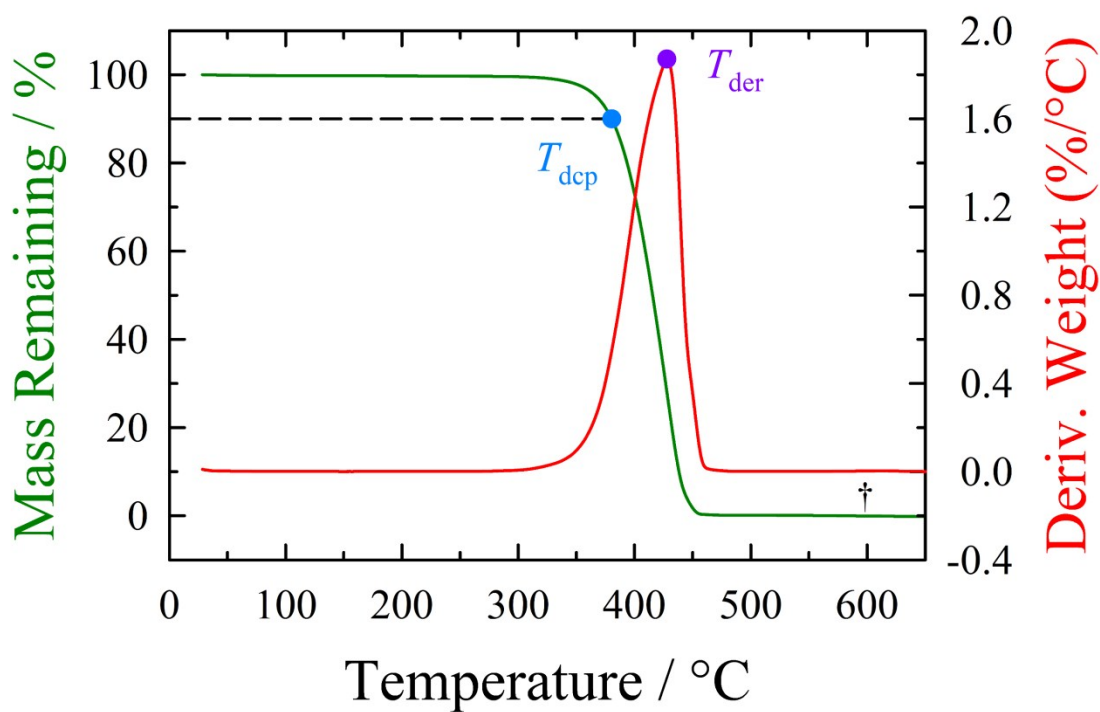

**Figure S9.** Thermogravimetric analysis of IL #9 (see Table 1).

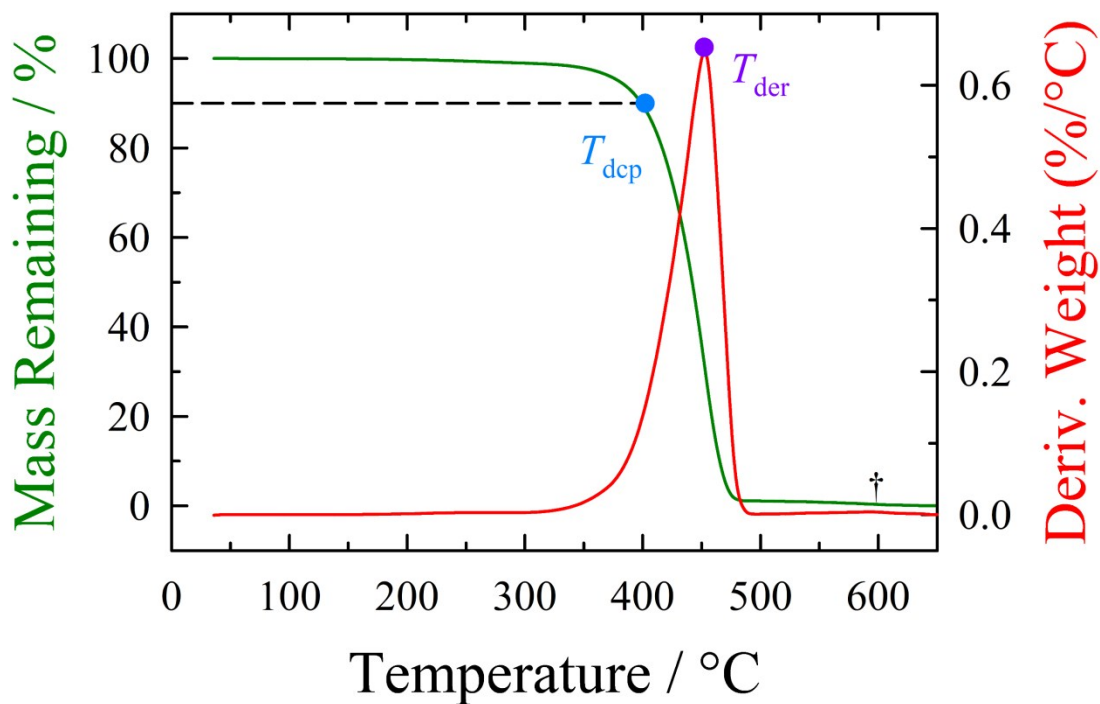

**Figure S10.** Thermogravimetric analysis of IL #10 (see Table 1).

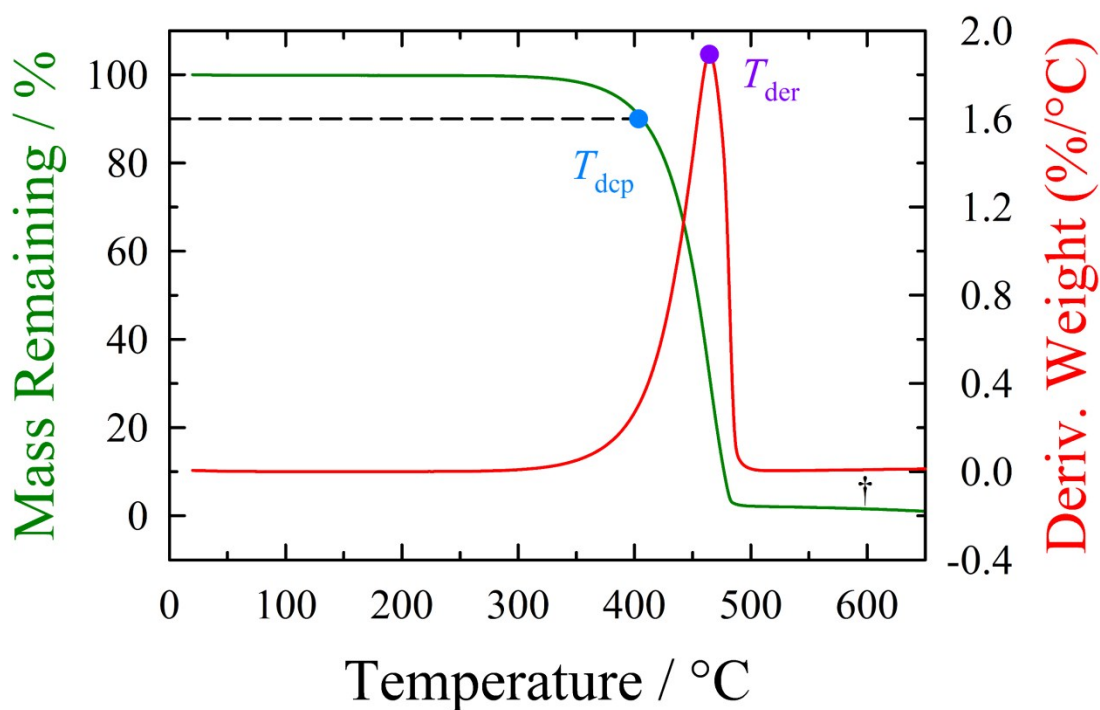

**Figure S11.** Thermogravimetric analysis of [BMIM][Tf<sub>2</sub>N] (IL #11 in Table 1).

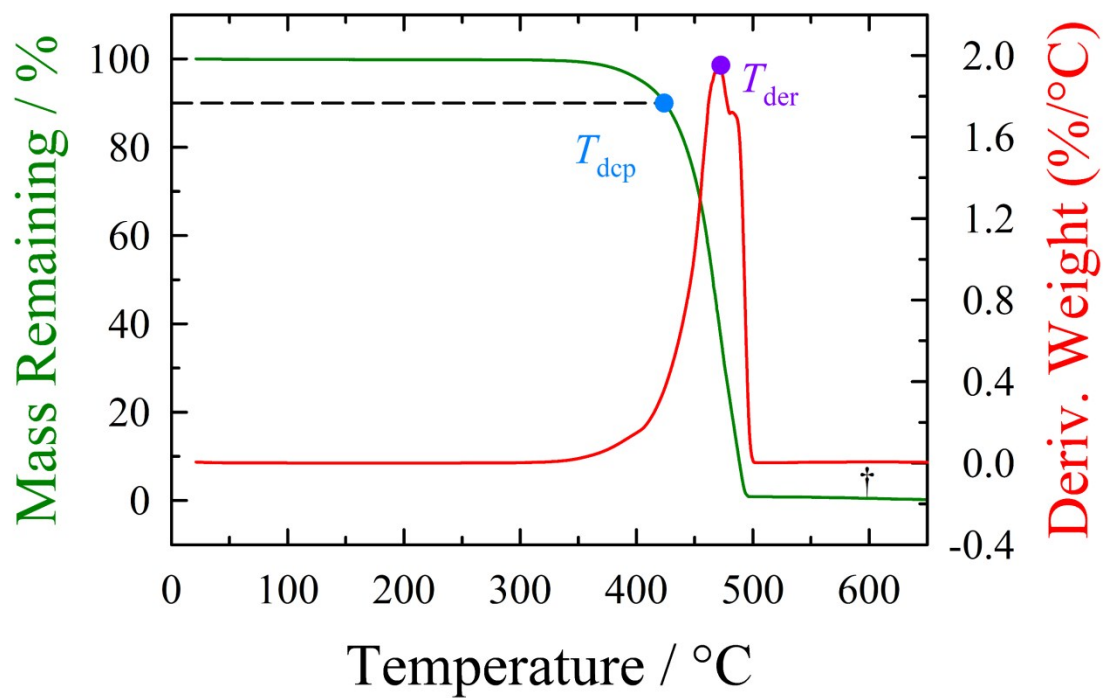

**Figure S12.** Thermogravimetric analysis of [BMIM][PF<sub>6</sub>] (IL #12 in Table 1).

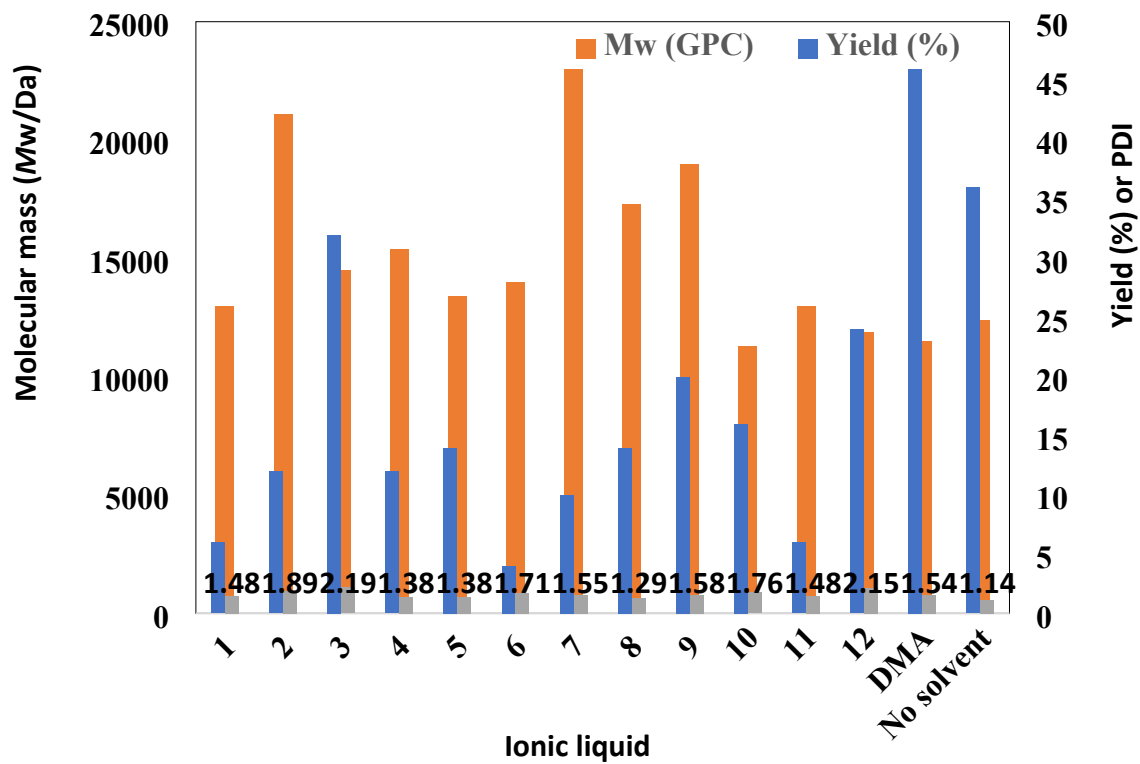

**Figure S13.** Comparison of  $M_w$ , yield and PDI of poly(L-lactide) in various ILs (based on data in Table 3; PDI values are listed in the graph).



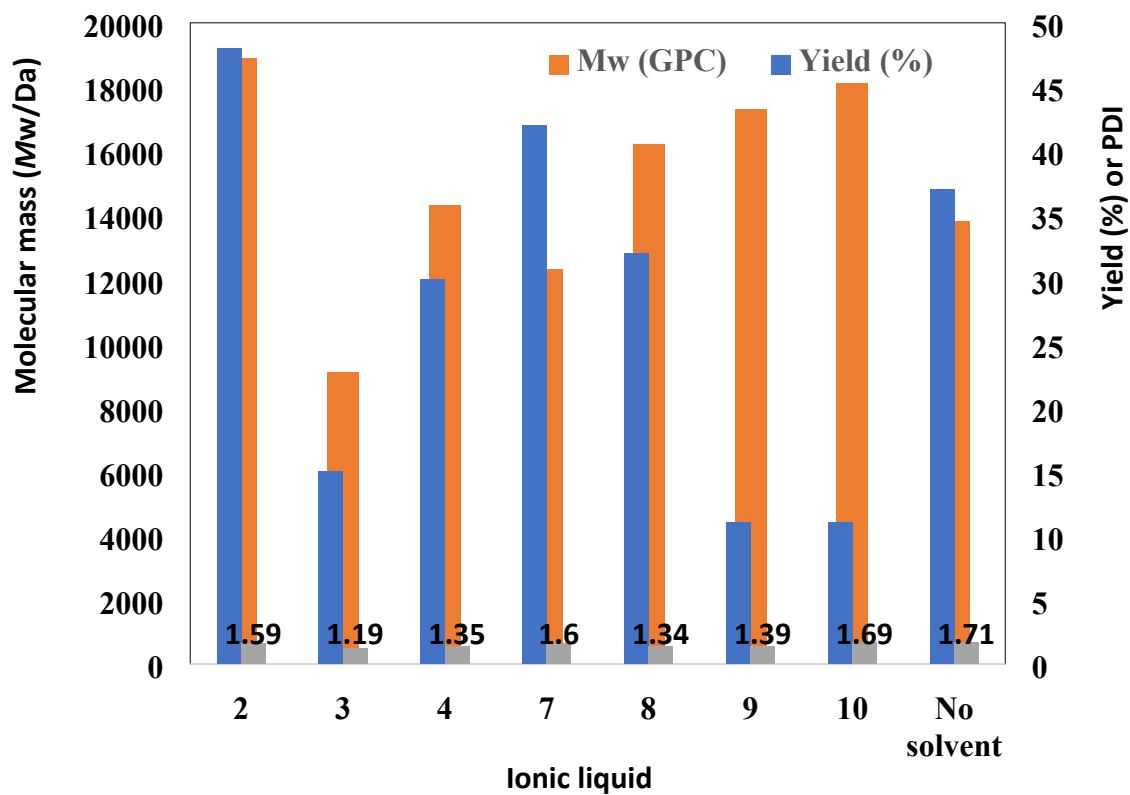

**Figure S14.** Comparison of  $M_w$ , yield and PDI of poly( $\epsilon$ -caprolactone) in various ILs (based on data in Table 3; PDI values are listed in the graph).
